# Supplementary material
Source: HighWire-hosted journal article supplement (http://thorax.bmj.com/highwire/filestream/174029/field_highwire_adjunct_files/0/Thorax_Appendix_148031.docx)
Supplement: Thorax_Appendix_148031.docx [file Thorax_Appendix_148031.docx]

**APPENDIX 1**

**Readcode Description**

N040G00 Rheumatoid arthritis of subtalar joint

N040D00 Rheumatoid arthritis of knee

N04y012 Fibrosing alveolitis associated with rheumatoid arthritis

N043100 Acute polyarticular juvenile rheumatoid arthritis

N040R00 Rheumatoid nodule

N040C00 Rheumatoid arthritis of sacro-iliac joint

N043300 Monarticular juvenile rheumatoid arthritis

2G27.00 O/E-hands-rheumatoid spindling

N040000 Rheumatoid arthritis of cervical spine

Nyu1200 [X]Other specified rheumatoid arthritis

N040A00 Rheumatoid arthritis of DIP joint of finger

N040400 Rheumatoid arthritis of acromioclavicular joint

N040700 Rheumatoid arthritis of wrist

N040800 Rheumatoid arthritis of MCP joint

N044.12 Nodular fibrositis of chronic rheumatic disease

N040S00 Rheumatoid arthritis - multiple joint

Nyu1100 [X]Other seropositive rheumatoid arthritis

N040M00 Rheumatoid arthritis of IP joint of toe

N040F00 Rheumatoid arthritis of ankle

N044.00 Chronic post-rheumatic arthropathy

N040K00 Rheumatoid arthritis of 1st MTP joint

N040N00 Rheumatoid vasculitis

N040P00 Seronegative rheumatoid arthritis

N040900 Rheumatoid arthritis of PIP joint of finger

N040H00 Rheumatoid arthritis of talonavicular joint

N040T00 Flare of rheumatoid arthritis

N040J00 Rheumatoid arthritis of other tarsal joint

N042200 Rheumatoid nodule

N040300 Rheumatoid arthritis of sternoclavicular joint

N042.00 Other rheumatoid arthropathy + visceral/systemic involvement

N043.00 Juvenile rheumatoid arthritis - Still's disease

N047.00 Seropositive errosive rheumatoid arthritis

N040L00 Rheumatoid arthritis of lesser MTP joint

N042000 Rheumatic carditis

N045500 Juvenile rheumatoid arthritis

N043200 Pauciarticular juvenile rheumatoid arthritis

14G1.00 H/O: rheumatoid arthritis

N040E00 Rheumatoid arthritis of tibio-fibular joint

N04y000 Rheumatoid lung

F396400 Myopathy due to rheumatoid arthritis

N040100 Other rheumatoid arthritis of spine

N040200 Rheumatoid arthritis of shoulder

N04..00 Rheumatoid arthritis and other inflammatory polyarthropathy

N04X.00 Seropositive rheumatoid arthritis, unspecified

N040500 Rheumatoid arthritis of elbow

N043z00 Juvenile rheumatoid arthritis NOS

N040600 Rheumatoid arthritis of distal radio-ulnar joint

N040B00 Rheumatoid arthritis of hip

H570.00 Rheumatoid lung

N040.00 Rheumatoid arthritis

N040Q00 Rheumatoid bursitis

N042100 Rheumatoid lung disease

Nyu1000 [X]Rheumatoid arthritis+involvement/other organs or systems

Nyu1G00 [X]Seropositive rheumatoid arthritis, unspecified

N043000 Juvenile rheumatoid arthropathy unspecified

F371200 Polyneuropathy in rheumatoid arthritis

N042z00 Rheumatoid arthropathy + visceral/systemic involvement NOS

N001000 Progressive systemic sclerosis

Q471100 Scleroderma in newborn

F396600 Myopathy due to scleroderma

Nyu4500 [X]Other forms of systemic sclerosis

M210z00 Circumscribed scleroderma NOS

N001.12 Systemic sclerosis

H572.00 Lung disease with systemic sclerosis

N001.00 Scleroderma

M210400 Linear scleroderma

M210000 Unspecified circumscribed scleroderma

N001100 CREST syndrome

M210.00 Circumscribed scleroderma

M154200 Lupus erythematosus migrans

N....00 Musculoskeletal and connective tissue diseases

N000000 Disseminated lupus erythematosus

Nyu4400 [X]Other dermatomyositis

N003.11 Poikilodermatomyositis

F396100 Myopathy due to disseminated lupus erythematosus

N003100 Dermatopolymyositis in neoplastic disease

N....11 Connective tissue diseases

K01x400 Nephrotic syndrome in systemic lupus erythematosus

N000400 Systemic lupus erythematosus with pericarditis

H57y100 Lung disease with polymyositis

Nyu4300 [X]Other forms of systemic lupus erythematosus

N000z00 Systemic lupus erythematosus NOS

F371000 Polyneuropathy in disseminated lupus erythematosus

H57y400 Lung disease with systemic lupus erythematosus

Nz...00 Musculoskeletal and connective tissue diseases NOS

Nyu4F00 [X]Mixed connective tissue disease

Myu7800 [X]Other local lupus erythematosus

M154600 Lupus erythematosus unguium mutilans

M154300 Lupus erythematosus nodularis

M154.00 Lupus erythematosus

N000.00 Systemic lupus erythematosus

Nyu4800 [X]Dermato(poly)myositis in neoplastic disease CE

M154000 Lupus erythematosus chronicus

Nyu4E00 [X]Dermatopolymyositis, unspecified

M154700 Subacute cutaneous lupus erythematosus

N00..11 Collagen diseases

N000500 Neonatal lupus erythematosus

M154400 Lupus erythematosus profundus

N00z.00 Collagen disease NOS

M154100 Discoid lupus erythematosus

N004.00 Polymyositis

N000300 Systemic lupus erythematosus with organ or sys involv

M154z00 Lupus erythematosus NOS

M154500 Lupus erythematosus tumidus

N003X00 Dermatopolymyositis, unspecified

N003000 Juvenile dermatomyositis

N00y.00 Other specified diffuse collagen diseases

K01x411 Lupus nephritis

N003.00 Dermatomyositis

F4D3300 Eyelid discoid lupus erythematosus

**APPENDIX 2**

**Readcode Description**

AD5..00 Sarcoidosis

AD50.00 Sarcoidosis of lung

AD51.00 Sarcoidosis of lymph nodes

AD52.00 Sarcoidosis of lung with sarcoidosis of lymph nodes

AD53.00 Sarcoidosis of skin

AD54.00 Sarcoidosis of inferior turbinates

AD55.00 Sarcoid arthropathy

Cyu0600 [X]Sarcoidosis of other and combined sites

F013.00 Meningitis due to sarcoidosis

F326300 Multiple cranial nerve palsies in sarcoidosis

F374900 Polyneuropathy in sarcoidosis

F396500 Myopathy due to sarcoidosis

G558300 Sarcoid heart disease

G5y7.00 Sarcoid myocarditis

H57y200 Pulmonary sarcoidosis

J63A.00 Hepatic granulomas in sarcoidosis

N233200 Myositis in sarcoidosis

Nyu8900 [X]Myositis in sarcoidosis classified elsewhere

H4...11 Pneumoconioses

H40..00 Coal workers' pneumoconiosis

H42..00 Silica and silicate pneumoconiosis

H420.00 Talc pneumoconiosis

H42z.00 Silica pneumoconiosis NOS

H43..00 Pneumoconiosis due to other inorganic dust

H43z.00 Pneumoconiosis due to inorganic dust NOS

H45..00 Pneumoconiosis NOS

Hyu4000 [X]Pneumoconiosis due to other dust containing silica

Hyu4100 [X]Pneumoconiosis due to other specified inorganic dusts

H41..00 Asbestosis

H41z.00 Asbestosis NOS

H35..00 Extrinsic allergic alveolitis

H35y.00 Other allergic alveolitis

H35yz00 Other allergic alveolitis NOS

H35z.00 Allergic alveolitis and pneumonitis NOS

H35z000 Allergic extrinsic alveolitis NOS

H35zz00 Allergic alveolitis and pneumonitis NOS
